# Supplementary material for: Low-coordination single Ni atoms on graphitic C3N4 for nitrite electroreduction to ammonia
Source: Royal Society of Chemistry journal article supplement (doi:10.1039/d3qi01425h), 2023-01-01
Supplement: d3qi01425h1.pdf [file d3qi01425h1.pdf]

# Supporting Information

## Low-coordination single Ni atoms on graphitic C<sub>3</sub>N<sub>4</sub> for nitrite electroreduction to ammonia

Hongyan Zhao #, Jiaqi Xiang #, Guike Zhang, Kai Chen, Ke Chu \*

*School of Materials Science and Engineering, Lanzhou Jiaotong University, Lanzhou 730070,  
China*

# These authors contributed equally to this work.

\*Corresponding author. [chuk630@mail.lzjtu.cn](mailto:chuk630@mail.lzjtu.cn) (K. Chu)

## Experimental Section

### Synthesis of Ni<sub>1</sub>/C<sub>3</sub>N<sub>4</sub>

Ni<sub>1</sub>/C<sub>3</sub>N<sub>4</sub> was synthesized by a thermal polymerization method. First, a mixture of 7 g of urea and 3 g of melamine was heated at 550 °C for 4 h to prepare the bulk g-C<sub>3</sub>N<sub>4</sub>, which was grinded to powder and subjected to 6 h of liquid exfoliation in anhydrous ethanol/deionized water (9:1 v/v) to obtain g-C<sub>3</sub>N<sub>4</sub> nanosheets. Afterwards, 0.02 g of g-C<sub>3</sub>N<sub>4</sub> was added to 30 mL of deionized water under sonication for 1 h, followed by adding 0.05 mL of 0.1 M NiCl<sub>2</sub> under stirring for 10 min. The mixed solution was standing for 1 h and then freeze-dried for 24 h to obtain Ni<sub>1</sub>/C<sub>3</sub>N<sub>4</sub>.

### Characterizations

X-ray diffraction (XRD) pattern was collected on a Rigaku D/max 2400 diffractometer. Transmission electron microscopy (TEM) and high-resolution transmission electron microscopy (HRTEM) were carried out on a Tecnai G<sup>2</sup> F20 microscope. Spherical aberration-corrected high-angle annular dark-field scanning transmission electron microscopy (AC HAADF-STEM) was performed on a Titan Themes Cubed G2 300 microscope.

### Electrochemical experiments

Electrochemical measurements were carried out on a CHI-760E electrochemical workstation using a conventional three-electrode cell. The catalyst loaded on carbon cloth (CC, 0.5 mg/ cm<sup>2</sup>) was used as the working electrode. Ag/AgCl and Pt foil were used as reference electrode and counter electrode, respectively. All potentials were referenced to reversible hydrogen electrode (RHE) by following equation:  $E_{\text{RHE}} \text{ (V)} = E_{\text{Ag/AgCl}} + 0.198 + 0.059 \times \text{pH}$ . The NO<sub>2</sub>RR measurements were carried out in 0.5 M Na<sub>2</sub>SO<sub>4</sub> containing 0.1 M NaNO<sub>2</sub> using an H-type cell separated by a Nafion 211 membrane. After each chronoamperometry test for 1 h, the produced NH<sub>3</sub> and other possible by-products were analyzed by various colorimetric methods using UV-vis absorbance spectrophotometer (MAPADA P5), while the gas products (H<sub>2</sub>, N<sub>2</sub>) were analyzed by gas chromatography (Shimadzu GC2010).

### Determination of NH<sub>3</sub>

NH<sub>3</sub> was quantitatively determined by the indophenol blue method<sup>1</sup>. Briefly, 2

mL NaOH solution (1 M) containing salicylic acid (5 wt%) and sodium citrate (5 wt%), 1 mL NaClO solution (0.05 M) and 0.2 mL Na[Fe(NO)(CN)<sub>5</sub>] (1wt%) were respectively added into the 2 ml diluted electrolyte. After standing for 2 h, the UV-Vis absorption spectra was measured and the concentration-absorbance curves were calibrated by the standard NH<sub>4</sub>Cl solution with a series of concentrations, and NH<sub>3</sub> yield rate and NH<sub>3</sub>-Faradaic efficiency (FE<sub>NH3</sub>) were calculated by the following equation:

NH<sub>3</sub> yield is calculated by

$$\text{NH}_3 \text{ yield } (\mu\text{g h}^{-1} \text{ cm}^{-2}) = \frac{c_{\text{NH}_3} \times V}{t \times A} \quad (1)$$

FE<sub>NH3</sub> is calculated by

$$FE_{\text{NH}_3} (\%) = \frac{6 \times F \times c_{\text{NH}_3} \times V}{M \times Q} \times 100\% \quad (2)$$

where  $c_{\text{NH}_3}$  ( $\mu\text{g mL}^{-1}$ ) is the measured NH<sub>3</sub> concentration,  $V$  (mL) is the volume of the electrolyte,  $t$  (h) is the reduction time and  $A$  ( $\text{cm}^{-2}$ ) is the area loading of the catalyst on CC,  $F$  ( $96500 \text{ C mol}^{-1}$ ) is the Faraday constant,  $M$  is the relative molecular mass of NH<sub>3</sub>,  $Q$  (C) is the quantity of applied electricity.

#### **Determination of N<sub>2</sub>H<sub>4</sub>**

The concentration of N<sub>2</sub>H<sub>4</sub> was determined by Watt and Chrisp method<sup>2</sup>. Typically, 5 mL of electrolyte was removed from the electrochemical reaction vessel. The 330 mL of color reagent containing 300 mL of ethyl alcohol, 5.99 g of C<sub>9</sub>H<sub>11</sub>NO and 30 mL of HCl were prepared, and 5 mL of color reagent was added into the electrolyte. After stirring for 10 min, the UV-vis absorption spectrum was measured and the concentration-absorbance curves were calibrated by the standard N<sub>2</sub>H<sub>4</sub> solution with a series of concentrations.

#### **Calculation details**

Spin-polarized DFT calculations were carried out using a Cambridge sequential total energy package (CASTEP). The Perdew–Burke–Ernzerhof (PBE) generalized gradient approximation (GGA) functional was used to model the exchange-correlation interactions. The DFT-D correction method was used to describe the van der Waals

interactions throughout the calculations. The electron wave functions were expanded using plane waves with a cutoff energy of 450 eV. The convergence tolerance was set to be  $1.0 \times 10^{-5}$  eV for energy and  $0.03$  eV  $\text{\AA}^{-1}$  for force. The Brillouin zone was sampled by  $3 \times 3 \times 1$  Monkhorst–Pack k-point mesh. The  $\text{C}_3\text{N}_4$  was modeled by a  $2 \times 2$  supercell, and a vacuum region of  $15$   $\text{\AA}$  was used to separate adjacent slabs. The adsorption energy ( $\Delta E$ ) is calculated as<sup>3</sup>

$$\Delta E = E_{\text{ads/slab}} - E_{\text{ads}} - E_{\text{slab}} \quad (3)$$

where  $E_{\text{ads/slab}}$ ,  $E_{\text{ads}}$  and  $E_{\text{slab}}$  are the total energies for adsorbed species on slab, adsorbed species and isolated slab, respectively.

The computational hydrogen electrode (CHE) model was adopted to calculate the Gibbs free energy change ( $\Delta G$ ) for each elementary step as follows<sup>3</sup>

$$\Delta G = \Delta E + \Delta ZPE - T\Delta S \quad (4)$$

where  $\Delta E$  is the adsorption energy,  $\Delta ZPE$  is the zero-point energy difference and  $T\Delta S$  is the entropy difference between the gas phase and adsorbed state. The entropies of free gases were acquired from the NIST database.

Molecular dynamics (MD) simulations were carried out using a force field type of Universal. The electrolyte system was geometrically optimized by setting the convergence tolerance of  $2.0 \times 10^{-5}$  kcal/mol for energy and  $0.001$  kcal/mol/ $\text{\AA}$  for force. The non-bond interaction was processed by Ewald with accuracy of  $10^{-5}$  Kcal/mol and the repulsive cutoff was chosen as  $12$   $\text{\AA}$ . The electrolyte system was set up by randomly placing 50 H, 1000  $\text{H}_2\text{O}$  and 50  $\text{NO}_2^-$  in a simulation box. After geometry optimization, the MD simulations were performed under the universal field with the total simulation time of 5 ns at a time step of 1 fs.

The radial distribution function (RDF) is calculated as<sup>4</sup>

$$g(r) = \frac{dN}{4\pi\rho r^2 dr} \quad (5)$$

where  $dN$  is the amount of  $\text{NO}_2^-/\text{H}$  in the shell between the central particle  $r$  and  $r+dr$ ,  $\rho$  is the number density of  $\text{NO}_2^-/\text{H}$ .

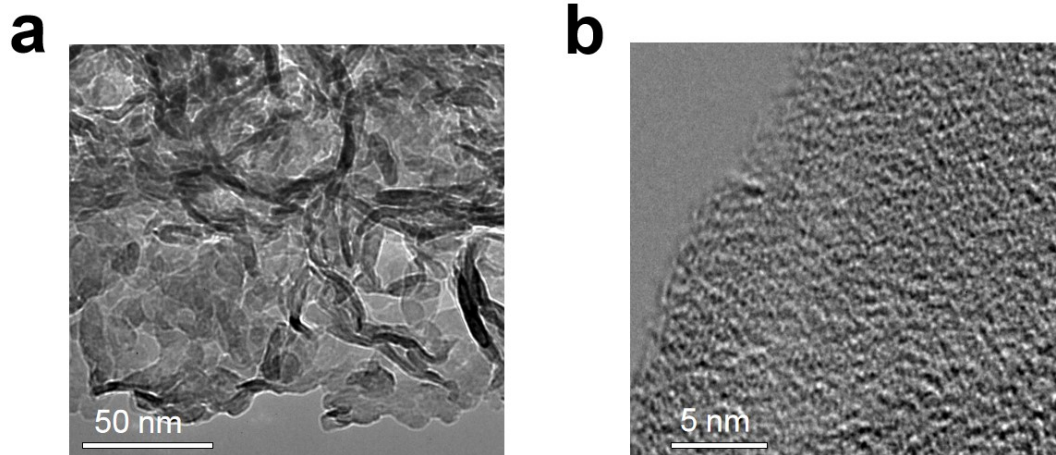

Figure S1. (a) TEM and (b) HRTEM images of pristine  $C_3N_4$ .

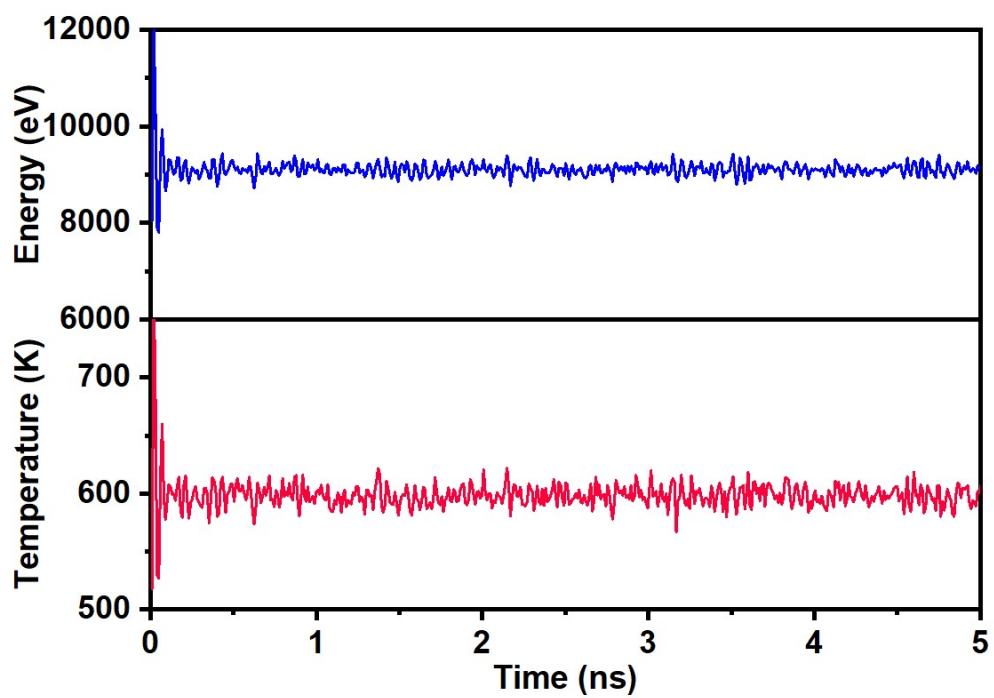

Figure S2. Variations of energy and temperature during the AIMD simulation for assessing the thermodynamic stability of  $\text{Ni}_1/\text{C}_3\text{N}_4$ .

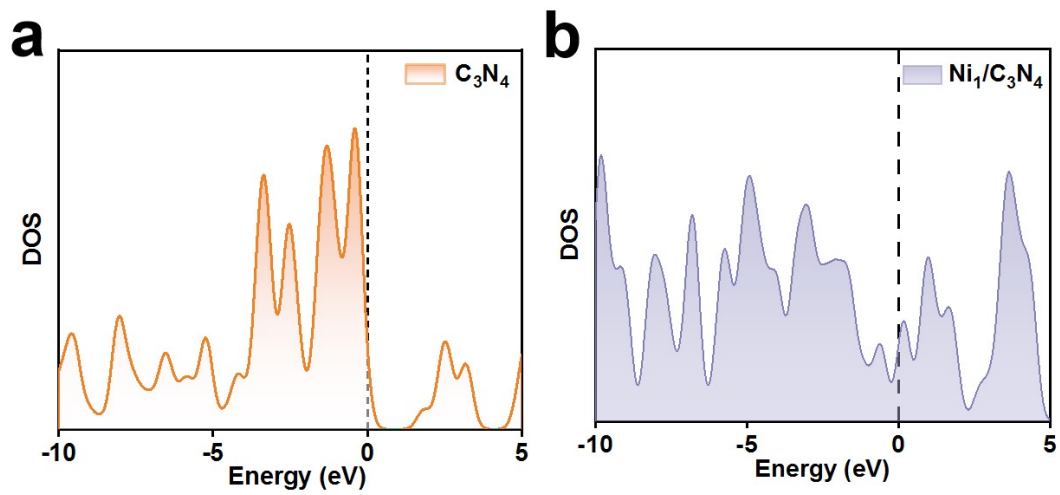

Figure S3. DOS profiles of (a)  $C_3N_4$  and (b)  $Ni_1/C_3N_4$ .

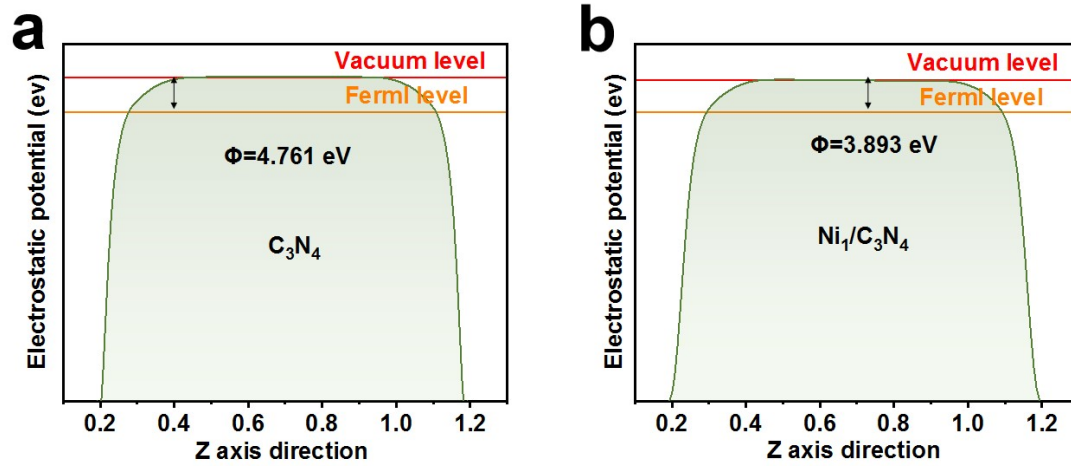

Figure S4. Average potential profiles along c-axis direction for calculating the work functions of (a)  $C_3N_4$  and (b)  $Ni_1/C_3N_4$ .



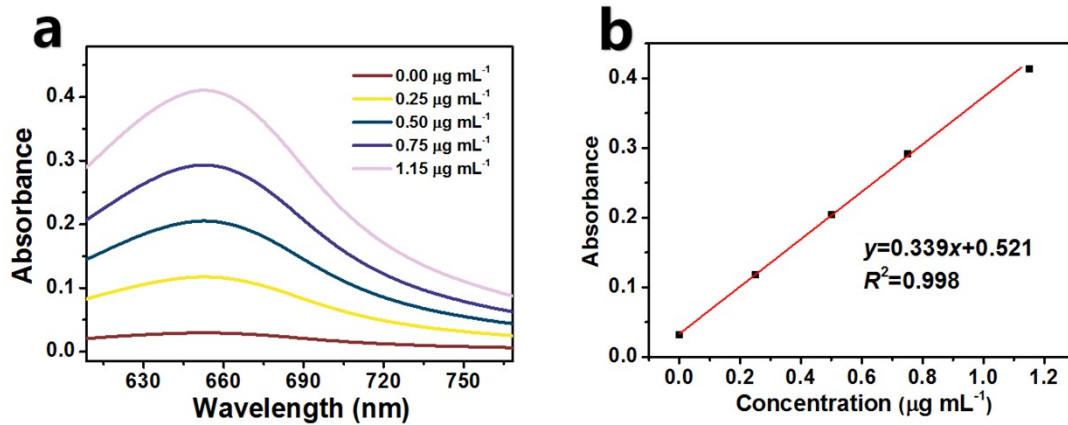

Figure S5. (a) UV-vis absorption spectra of  $\text{NH}_4^+$  assays after incubated for 2 h at ambient conditions. (b) Calibration curve used for the calculation of  $\text{NH}_3$  concentrations.

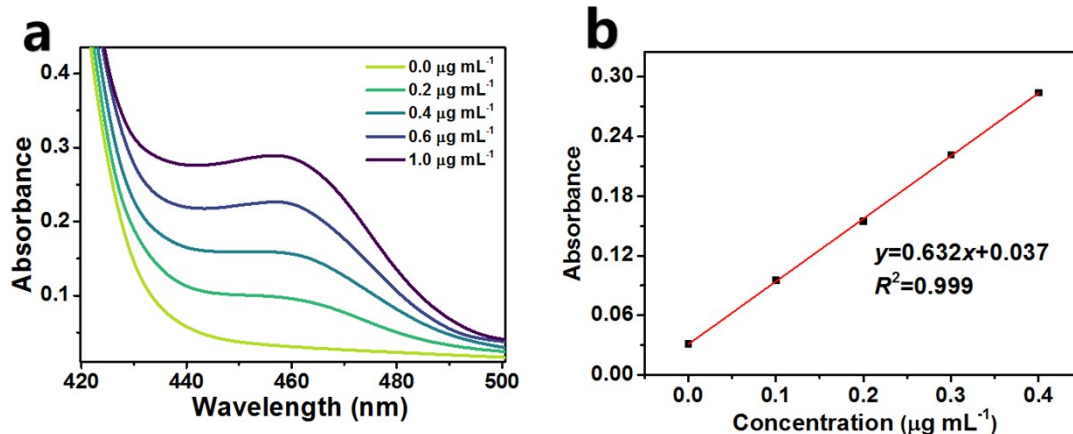

Figure S6. (a) UV-vis absorption spectra of  $N_2H_4$  assays after incubated for 2 h at ambient conditions. (b) Calibration curve used for the calculation of  $N_2H_4$  concentrations.

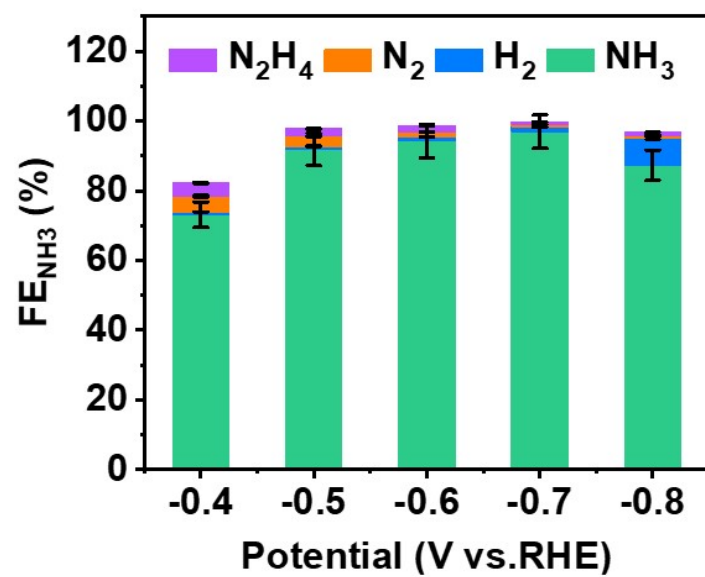

Figure S7. FEs of different products on Ni<sub>1</sub>/C<sub>3</sub>N<sub>4</sub> at various potentials.

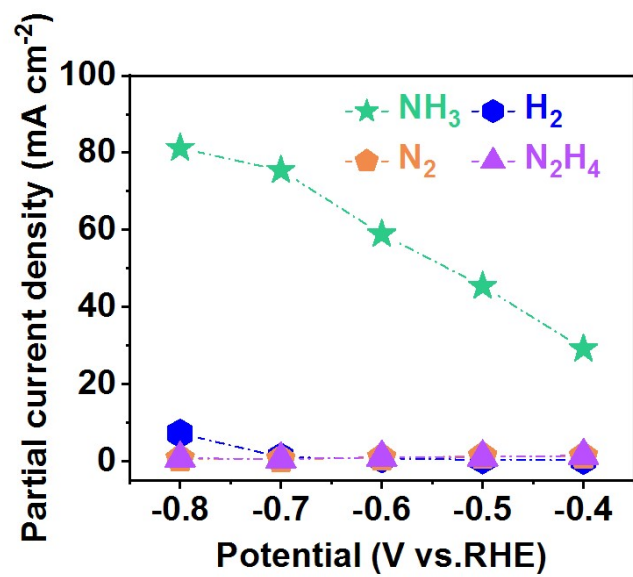

Figure S8. Partial current densities of various products on Ni<sub>1</sub>/C<sub>3</sub>N<sub>4</sub> at different potentials.

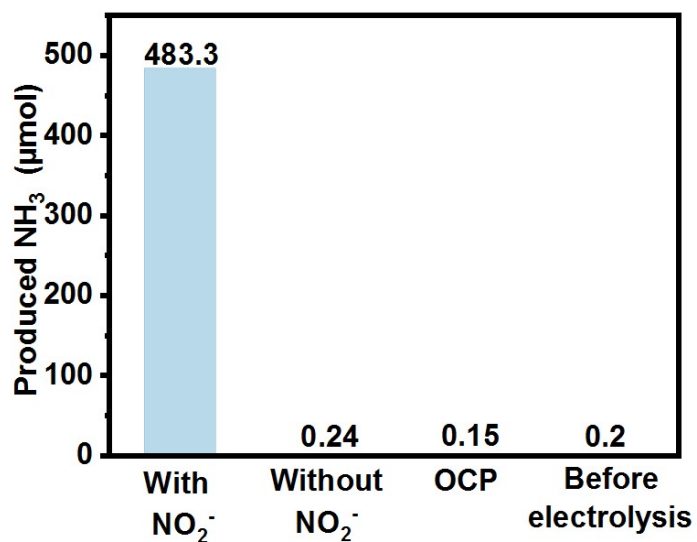

Figure S9. Amounts of produced NH<sub>3</sub> on Ni<sub>1</sub>/C<sub>3</sub>N<sub>4</sub> under different conditions: (1) electrolysis in NO<sub>2</sub><sup>-</sup>-containing solution at -0.7 V, (2) electrolysis in NO<sub>2</sub><sup>-</sup>-free solution at -0.7 V, (3) electrolysis in NO<sub>2</sub><sup>-</sup>-containing solution at open-circuit potential (OCP), (4) before electrolysis.

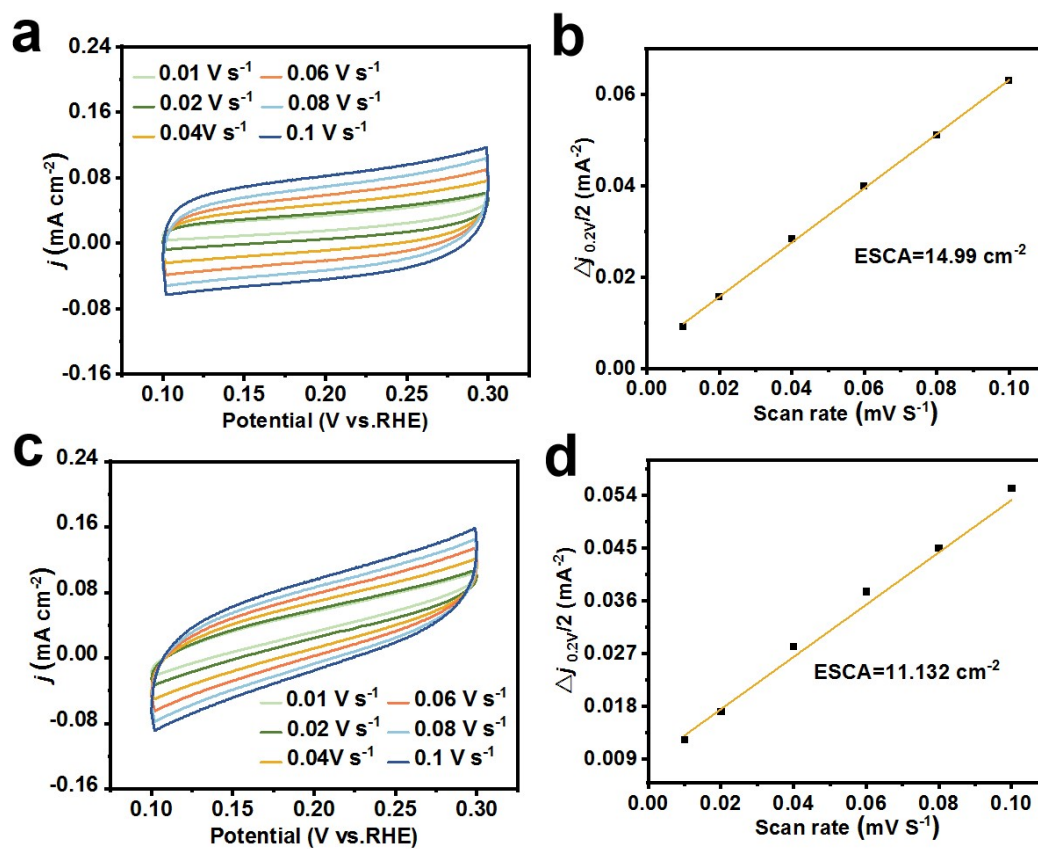

Figure S10. CV measurements at different scanning rates for (a, b)  $\text{Ni}_1/\text{C}_3\text{N}_4$  and (c, d)  $\text{C}_3\text{N}_4$ , and corresponding calculated ECSA.

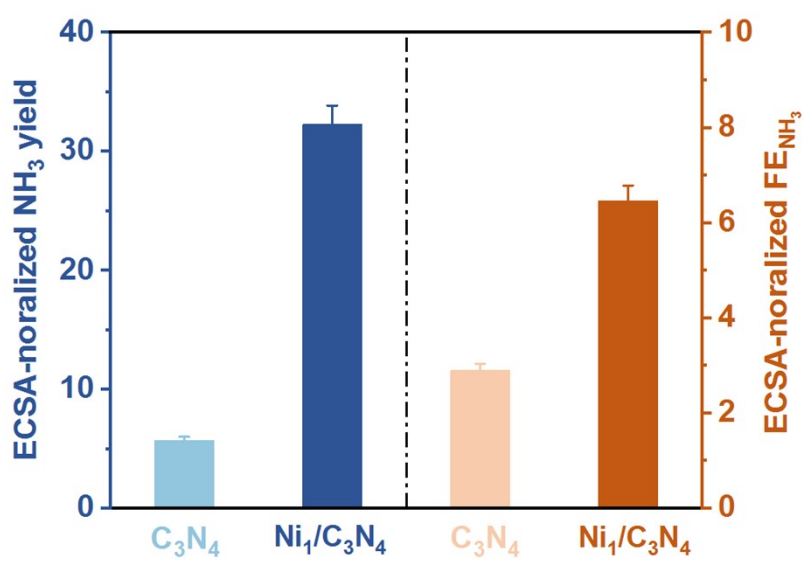

Figure S11. Comparison of the ECSA-normalized NH<sub>3</sub> yield rates and FE<sub>NH<sub>3</sub></sub> between C<sub>3</sub>N<sub>4</sub> and Ni<sub>1</sub>/C<sub>3</sub>N<sub>4</sub> at -0.7 V.

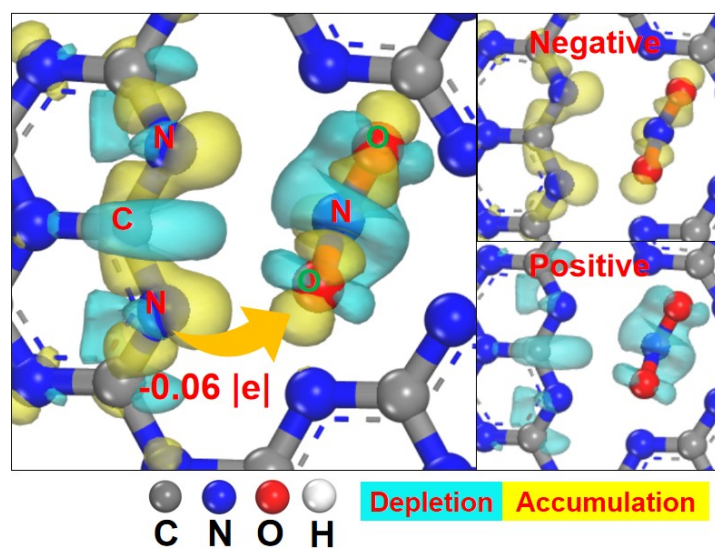

Figure S12. Charge density difference of absorbed  $\text{NO}_2^-$  on  $\text{C}_3\text{N}_4$



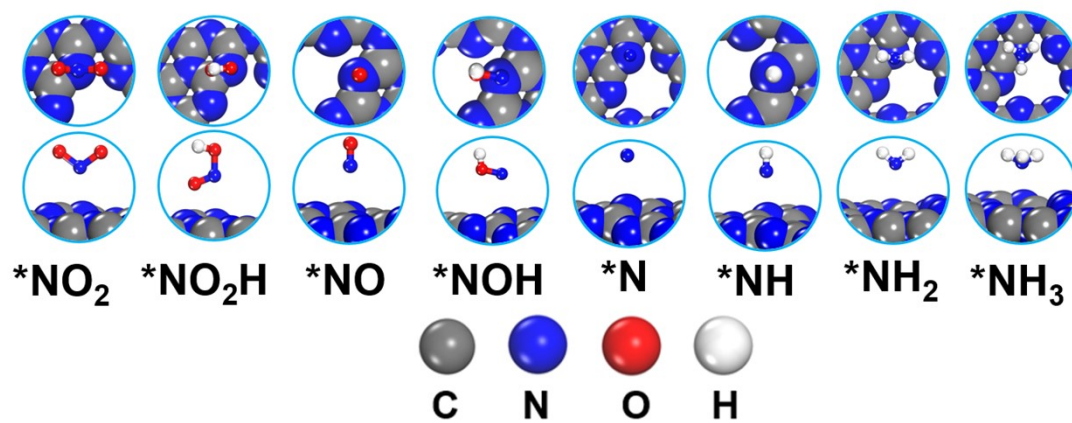

Figure S13. Optimized atomic structures of the reaction intermediates on  $\text{C}_3\text{N}_4$ .

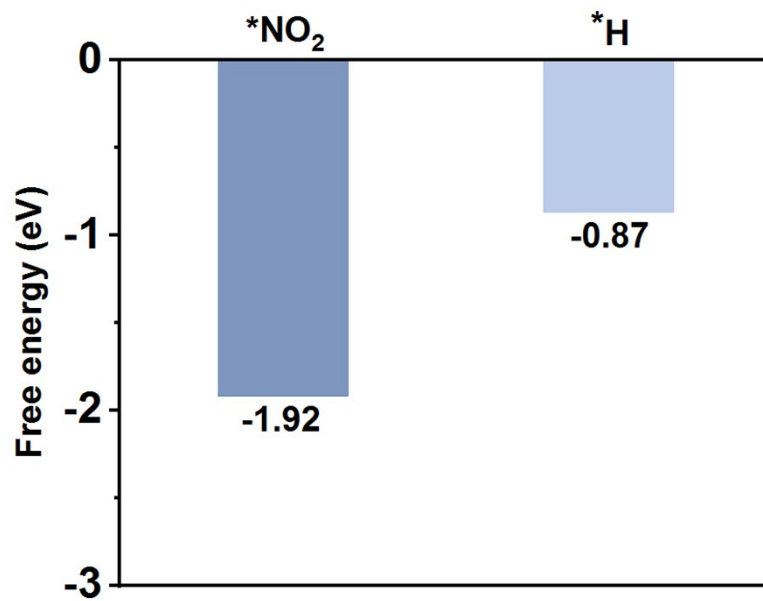

Figure S14. Binding free energies of  $*NO_2$  and  $*H$  on  $Ni_1/C_3N_4$ .

Table S1. Structural parameters extracted from the EXAFS fitting results of Ni<sub>1</sub>/C<sub>3</sub>N<sub>4</sub>

| Sample                                         | Shell | CN  | R (Å) | $\sigma^2$ ( $10^{-3}\text{Å}^2$ ) | $\Delta E_0$ (eV) | R factor |
|------------------------------------------------|-------|-----|-------|------------------------------------|-------------------|----------|
| Ni <sub>1</sub> /C <sub>3</sub> N <sub>4</sub> | Ni-N  | 2.2 | 1.86  | 7.8                                | 4.1               | 0.008    |

CN is the coordination number, R is interatomic distance,  $\sigma^2$  is Debye-Waller factor,  $\Delta E_0$  is edge-energy shift, R factor is used to value the goodness of the fitting.

Table S2. Comparison of the optimum NH<sub>3</sub> yield and FE<sub>NH<sub>3</sub></sub> for the recently reported state-of-the-art NO<sub>2</sub>RR electrocatalysts at ambient conditions

| Catalyst                                         | Electrolyte                                                                            | NH <sub>3</sub> yield rate<br>( $\mu\text{mol h}^{-1} \text{cm}^{-2}$ ) | FE <sub>NH<sub>3</sub></sub><br>(%) | Potential<br>(V vs RHE) | Ref.             |
|--------------------------------------------------|----------------------------------------------------------------------------------------|-------------------------------------------------------------------------|-------------------------------------|-------------------------|------------------|
| CoB@TiO <sub>2</sub> /TP                         | 0.1 M Na <sub>2</sub> SO <sub>4</sub><br>(0.1 M NO <sub>2</sub> <sup>-</sup> )         | 233.1                                                                   | 95.2                                | -0.7 V                  | 5                |
| Ag@NiO/CC                                        | 0.1 M NaOH<br>(0.1 M NO <sub>2</sub> <sup>-</sup> )                                    | 235.4                                                                   | 97.7                                | -0.4 V                  | 6                |
| Cu/JDC/CP                                        | 0.1 M NaOH<br>(0.1 M NO <sub>2</sub> <sup>-</sup> )                                    | 523.5                                                                   | 93.2                                | -0.6 V                  | 7                |
| ITO@TiO <sub>2</sub> /TP                         | 0.5 M LiClO <sub>4</sub><br>(0.1 M NO <sub>2</sub> <sup>-</sup> )                      | 411.3                                                                   | 82.6                                | -0.5 V                  | 8                |
| CF@Cu <sub>2</sub> O                             | 0.1 M PBS<br>(0.1 M NO <sub>2</sub> <sup>-</sup> )                                     | 441.8                                                                   | 94.2                                | -0.6 V                  | 9                |
| Ni-TiO <sub>2</sub> /TP                          | 0.1 M NaOH<br>(0.1 M NO <sub>2</sub> <sup>-</sup> )                                    | 380.27                                                                  | 94.89                               | -0.5 V                  | 10               |
| V-TiO <sub>2</sub> /TP                           | 0.1 M NaOH<br>(0.1 M NO <sub>2</sub> <sup>-</sup> )                                    | 540.8                                                                   | 93.2 @ -0.6                         | -0.7 V                  | 11               |
| NiS <sub>2</sub> @TiO <sub>2</sub> /T            | 0.1 M NaOH<br>(0.1 M NO <sub>2</sub> <sup>-</sup> )                                    | 485.4                                                                   | 92.1                                | -0.5 V                  | 12               |
| Ni <sub>2</sub> P/NF                             | 0.1 M PBS<br>(0.1 M NO <sub>2</sub> <sup>-</sup> )                                     | 191.3                                                                   | 90.2±3.0                            | -0.3 V                  | 13               |
| <b>Ni<sub>1</sub>/C<sub>3</sub>N<sub>4</sub></b> | <b>0.5 M Na<sub>2</sub>SO<sub>4</sub></b><br><b>(0.1 M NO<sub>2</sub><sup>-</sup>)</b> | <b>483.3</b>                                                            | <b>96.9</b>                         | <b>-0.7 V</b>           | <b>This work</b> |

## Supplementary references

1. D. Zhu, L. Zhang, R. E. Ruther and R. Hamers, Photo-illuminated diamond as a solid-state source of solvated electrons in water for nitrogen reduction, *Nat. Mater.*, 2013, **12**, 836-841.
2. G. W. Watt and J. D. Chrisp, Spectrophotometric method for determination of hydrazine, *Anal. Chem.*, 1952, **24**, 2006-2008.
3. A. A. Peterson, F. Abild-Pedersen, F. Studt, J. Rossmeisl and J. K. Nørskov, How copper catalyzes the electroreduction of carbon dioxide into hydrocarbon fuels, *Energy Environ. Sci.*, 2010, **3**, 1311-1315.
4. K. Chu, Y. Luo, P. Shen, X. Li, Q. Li and Y. Guo, Unveiling the synergy of O-vacancy and heterostructure over  $\text{MoO}_{3-x}/\text{MXene}$  for  $\text{N}_2$  electroreduction to  $\text{NH}_3$ , *Adv. Energy Mater.*, 2022, **12**, 2103022.
5. L. Hu, D. Zhao, C. Liu, Y. Liang, D. Zheng, S. Sun, Q. Li, Q. Liu, Y. Luo, Y. Liao, L. Xie and X. Sun, Amorphous CoB nanoarray as a high-efficiency electrocatalyst for nitrite reduction to ammonia, *Inorg. Chem. Front.*, 2022, **9**, 6075-6079.
6. Q. Liu, G. Wen, D. Zhao, L. Xie, S. Sun, L. Zhang, Y. Luo, A. Ali Alshehri, M. S. Hamdy, Q. Kong and X. Sun, Nitrite reduction over Ag nanoarray electrocatalyst for ammonia synthesis, *J. Colloid Interf. Sci.*, 2022, **623**, 513-519.
7. L. Ouyang, L. Yue, Q. Liu, Q. Liu, Z. Li, S. Sun, Y. Luo, A. Ali Alshehri, M. S. Hamdy, Q. Kong and X. Sun, Cu nanoparticles decorated juncus-derived carbon for efficient electrocatalytic nitrite-to-ammonia conversion, *J. Colloid Interf. Sci.*, 2022, **624**, 394-399.
8. S. Li, J. Liang, P. Wei, Q. Liu, L. Xie, Y. Luo and X. Sun, ITO@ $\text{TiO}_2$  nanoarray: An efficient and robust nitrite reduction reaction electrocatalyst toward  $\text{NH}_3$  production under ambient conditions, *eScience*, 2022, **2**, 382-388.
9. Q. Chen, X. An, Q. Liu, X. Wu, L. Xie, J. Zhang, W. Yao, M. S. Hamdy, Q. Kong and X. Sun, Boosting electrochemical nitrite–ammonia conversion properties by a Cu foam@ $\text{Cu}_2\text{O}$  catalyst, *Chem. Commun.*, 2022, **58**, 517-520.
10. Z. Cai, C. Ma, D. Zhao, X. Fan, R. Li, L. Zhang, J. Li, X. He, Y. Luo, D. Zheng, Y. Wang, B. Ying, S. Sun, J. Xu, Q. Lu and X. Sun, Ni doping enabled improvement in electrocatalytic nitrite-to-ammonia conversion over  $\text{TiO}_2$  nanoribbon, *Mater. Today Energy*, 2023, **31**, 101220.
11. H. Wang, F. Zhang, M. Jin, D. Zhao, X. Fan, Z. Li, Y. Luo, D. Zheng, T. Li, Y. Wang, B. Ying, S. Sun, Q. Liu, X. Liu and X. Sun, V-doped  $\text{TiO}_2$  nanobelt array for high-efficiency electrocatalytic nitrite reduction to ammonia, *Mater. Today Phys.*, 2023, **30**, 100944.
12. X. He, L. Hu, L. Xie, Z. Li, J. Chen, X. Li, J. Li, L. Zhang, X. Fang, D. Zheng, S. Sun, J. Zhang, A. Ali Alshehri, Y. Luo, Q. Liu, Y. Wang and X. Sun, Ambient ammonia synthesis via nitrite electroreduction over  $\text{NiS}_2$  nanoparticles-decorated  $\text{TiO}_2$  nanoribbon array, *J. Colloid Interf. Sci.*, 2023, **634**, 86-92.
13. G. Wen, J. Liang, L. Zhang, T. Li, Q. Liu, X. An, X. Shi, Y. Liu, S. Gao, A. M. Asiri, Y. Luo, Q. Kong and X. Sun,  $\text{Ni}_2\text{P}$  nanosheet array for high-efficiency electrohydrogenation of nitrite to ammonia at ambient conditions, *J. Colloid Interf. Sci.*, 2022, **606**, 1055-1063.
